Version dated: January 13, 2022

# ACDC: Analysis of Congruent Diversification Classes

Sebastian Höhna<sup>1,2\*</sup>, Bjørn T. Kopperud<sup>1,2</sup> and Andrew F. Magee<sup>3</sup>

<sup>1</sup>*GeoBio-Center LMU, Ludwig-Maximilians-Universität München, Richard-Wagner Straße 10, 80333 Munich, Germany*

<sup>2</sup>*Department of Earth and Environmental Sciences, Paleontology & Geobiology, Ludwig-Maximilians-Universität München, Richard-Wagner Straße 10, 80333 Munich, Germany*

<sup>3</sup>*Department of Human Genetics, University of California, Los Angeles, 90095, U.S.A.*

**Running title:** Analysis of Congruent Diversification Rates

**Word count:** 3938 words

**\*Corresponding author:** Sebastian Höhna, GeoBio-Center LMU,  
Ludwig-Maximilians-Universität München, Richard-Wagner Straße 10, 80333 Munich, Germany  
E-mail: [hoehna@lmu.de](mailto:hoehna@lmu.de).

## 1 Summary

2 **1.** Diversification rates inferred from phylogenies are not identifiable. There are infinitely many  
3 combinations of speciation and extinction rate functions that have the exact same likelihood score  
4 for a given phylogeny, building a congruence class. The specific shape and characteristics of such  
5 congruence classes have not yet been studied. Whether speciation and extinction rate functions  
6 within a congruence class share common features is also not known.

7 **2.** Instead of striving to make the diversification rates identifiable, we can embrace their inherent  
8 non-identifiable nature. We use two different approaches to explore a congruence class: (i) testing  
9 of specific alternative hypotheses, and (ii) randomly sampling alternative rate function within the  
10 congruence class.

11 **3.** Our methods are implemented in the open-source R package ACDC  
12 (<https://github.com/afmagee/ACDC>). ACDC provides a flexible approach to explore the  
13 congruence class and provides summaries of rate functions within a congruence class. The  
14 summaries can highlight common trends, i.e. increasing, flat or decreasing rates.

15 **4.** Although there are infinitely many equally likely diversification rate functions, these can share  
16 common features. ACDC can be used to assess if diversification rate patterns are robust despite  
17 non-identifiability. In our example, we clearly identify three phases of diversification rate changes  
18 that are common among all models in the congruence class. Thus, congruence classes are not  
19 necessarily a problem for studying historical patterns of biodiversity from phylogenies.

20 **Key-words:** Birth-death models, macroevolution, diversification rates, identifiability, congruence  
21 class.

## 22 1 Introduction

23 In macroevolution, one prominent avenue of research is to estimate macroevolutionary  
24 rates of diversification from molecular phylogenies (Ricklefs 2007; Morlon 2014). Specifically,  
25 many studies are interested in inferring time-varying diversification rates. Time-varying  
26 diversification rates are used to study monotonous slowdowns/increases using continuous  
27 functions (e.g., Rabosky 2006; Morlon *et al.* 2011; Höhna 2014), abrupt shifts in diversification  
28 rates (e.g., Stadler 2011; May *et al.* 2016; Magee *et al.* 2020), mass extinction (e.g., Höhna 2015;  
29 May *et al.* 2016; Culshaw *et al.* 2019; Magee & Höhna 2021) and correlations to environmental  
30 factors (e.g., Condamine *et al.* 2013; 2019; Palazzesi *et al.* 2022). Unfortunately, time-varying  
31 diversification rates are not identifiable when estimated from time-calibrated phylogenies, while  
32 allowing for any continuous diversification rate function (Kubo & Iwasa 1995; Louca & Pennell  
33 2020). That is, infinitely many combinations of speciation and extinction rate functions,  
34 summarized within a *congruence class*, result in the same likelihood given a phylogenetic tree  
35 (Kubo & Iwasa 1995; Louca & Pennell 2020).

36 However, the existence of infinitely many equivalently likely rate functions does not imply  
37 that one cannot draw any general conclusions. We do not know yet which diversification rate  
38 functions are within a congruence class, and if these diversification rate function share some  
39 specific features (e.g., rate changes at the same time). If we obtained estimates of diversification  
40 rates for our study group, then we could be interested in exploring all or a sample of  
41 diversification rates included in the congruence class to identify shared features. Furthermore, we  
42 could test if different specific diversification rate scenarios are included within a congruence class,  
43 for example, if a model with exponentially increasing/decreasing diversification rates is included  
44 in the congruence class. Similarly, we could test if models with rate shifts at specific times,  
45 corresponding to alternative hypotheses, are included in the congruence class.

46 Here we provide the R package ACDC (Analysis of Congruent Diversification Rates) that (1)  
47 converts between models within the same congruence class, (2) explores the full congruence class,  
48 and (3) shows common trends among models within the same congruence class. Conversion  
49 between congruent models is useful if a researcher wants to explore alternative hypotheses, for  
50 example, “what if the extinction rate was not constant but instead exponentially increased  
51 through time?” Full exploration of the congruence class can highlight general features of a  
52 congruence class, for example, if a researcher has estimated a given pattern of diversification rates  
53 and wants to know if all models within the congruence class show a certain trend (e.g., a rate  
54 shift at time  $t$ ). Finally, all explored models can be analyzed to show common patterns of  
55 diversification rate increases and decreases. With our R package ACDC, researchers can test which  
56 patterns are robust to the congruence class.

## 57 2 Theory and Usage

58 In this section we provide the theory and our approach as well as how to use ACDC. We  
59 start by explaining how ACDC processes any diversification rate function to construct the  
60 congruence class. Next, we explain how ACDC obtains alternative (congruent) matching pairs of  
61 speciation and extinction rates functions. Then, we show how specific hypotheses can be tested  
62 and how to explore the congruence class using diversification rate functions generated from a  
63 process or a distribution. Finally, we demonstrate how alternative diversification rate models  
64 within the congruence class can be summarized to assess for shared trends.

### 65 2.1 Linear interpolation

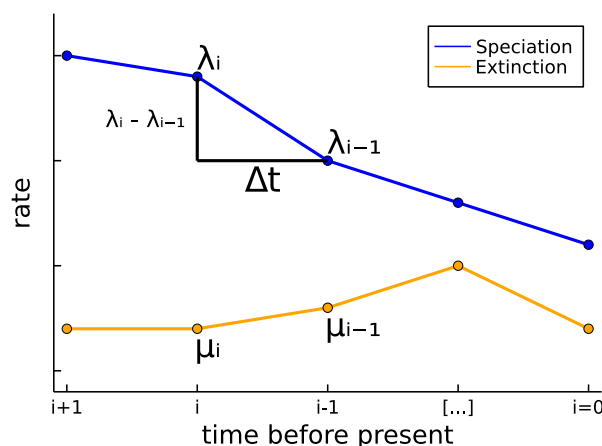

**Figure 1:** Schematic of the piecewise linear rate functions. The piecewise linear function shows how any continuous function can be approximated if sufficiently many linear components are used. We use the index  $i = 0$  for the present, and increasing toward the past. The finite difference  $\lambda_i - \lambda_{i-1}$  per time interval  $\Delta t$  represents the slope of the rate function. The finite difference is important to analytically compute the slope (i.e., the derivative) of the rate function at any time.

66 Congruence classes are derived for arbitrary continuous functions of speciation and  
67 extinction rates (Louca & Pennell 2020). Unfortunately, it is not feasible to always work with  
68 arbitrary continuous functions because the derivative is unknown. Instead, we use a piecewise  
69 linear approximation of arbitrary user-defined rate functions to enable the exploration of  
70 congruence classes (Fig. 1). This approximation should be unproblematic for representing existing  
71 models, especially since piecewise constant diversification models are often used for diversification  
72 rate inference (Stadler 2011; May *et al.* 2016; Magee *et al.* 2020; Magee & Höhna 2021).  
73 Moreover, the piecewise linear approximation can become arbitrarily close to any continuous  
74 function if the number of pieces is sufficiently large. We show the effect of the number of pieces  
75 used on the accuracy of the approximation in the Supplementary Material.

76 We assume a grid of  $n + 1$  times,  $t_0, t_1, \dots, t_n$ , with constant spacing  $\Delta t$ . This grid  
77 typically spans between 0 and the root age of the phylogenetic tree. The piecewise linear  
78 speciation rate approximation is defined by linear interpolation of the vector  $\boldsymbol{\lambda} = \lambda_0, \dots, \lambda_n$ .  
79 Specifically, as depicted in Fig. 1, the (interpolated) speciation rate within the interval  
80  $t_{i-1} < t \leq t_i$  is

$$81 \quad \lambda(t) = \lambda_{i-1} + \frac{\lambda_i - \lambda_{i-1}}{\Delta t}(t - t_{i-1}) \quad . \quad (1)$$

82 The extinction rate approximation is defined analogously.

83 As an empirical example, we estimated speciation and extinction rates for the primates  
84 phylogeny from Springer *et al.* (2012) using a horseshoe Markov random field (HSMRF) prior  
85 distribution (Carvalho *et al.* 2010; Magee *et al.* 2020) as implemented in RevBayes (Höhna *et al.*  
86 2016). The specific details about the data set and Markov chain Monte Carlo settings are not  
87 important for this study, but can be found at  
88 <https://revbayes.github.io/tutorials/divrate/ebd.html>. We include the samples from the posterior  
89 distribution in our package for convenience. We will use this example to showcase how to explore  
90 the congruence class with ACDC. In R, we can set up the piecewise linear rate functions as follows.

```
91 library(ACDC)  
92 data(primates_ebd)  
93 lambda <- approxfun(primates_ebd$time, primates_ebd$lambda)  
94 mu <- approxfun(primates_ebd$time, primates_ebd$mu)
```

## 95 2.2 Constructing the Congruence Class

96 The central idea in ACDC is to construct the congruence class given a speciation and extinction  
97 rate function. A congruence class is fully specified by either the pulled net-diversification rate  
98  $r_p(t)$  and the speciation rate at the present ( $\lambda_0$ ), or the pulled speciation rate  $\lambda_p(t)$ . That is, any  
99 combination of speciation and extinction rate function that result in the same pulled  
100 net-diversification rate  $r_p(t)$  and speciation rate at the present ( $\lambda_0$ ), or pulled speciation rate  
101  $\lambda_p(t)$ , belong to the same congruence class (Louca & Pennell 2020). We can therefore set up the  
102 congruence class by constructing the pulled net-diversification rate  $r_p(t)$ . The pulled  
103 net-diversification rate is defined as (Louca & Pennell 2020)

$$104 \quad r_p(t) = \lambda(t) - \mu(t) + \frac{1}{\lambda(t)} \frac{d\lambda(t)}{dt} \quad . \quad (2)$$

105 Since we are using piecewise linear speciation and extinction rates (Fig. 1), we obtain (at the  
 106 interval times) the analytical solution for the pulled net-diversification rate as

$$107 \quad r_p(t_i) = \lambda_i - \mu_i + \frac{1}{\lambda_i} \frac{\lambda_i - \lambda_{i-1}}{\Delta t} \quad . \quad (3)$$

108 The equation for the pulled speciation is (Louca & Pennell 2020):

$$109 \quad \lambda_p(t) = (1 - E(t))\lambda(t) \quad , \quad (4)$$

110 where  $E(t)$  is the probability that the lineage observed at time  $t$  goes extinct before the present.

111 Currently we only use the pulled speciation rate for plotting purposes.

112 We use the pulled net-diversification rate to construct the congruence class because it  
 113 simplifies the equations. Continuing with the primates data example, we can construct the  
 114 congruence class in ACDC as follows.

```
115 times <- seq(0, max(primates_ebd$time, length.out = 1000))
116 my_model <- create.model(lambda, mu, times)
```

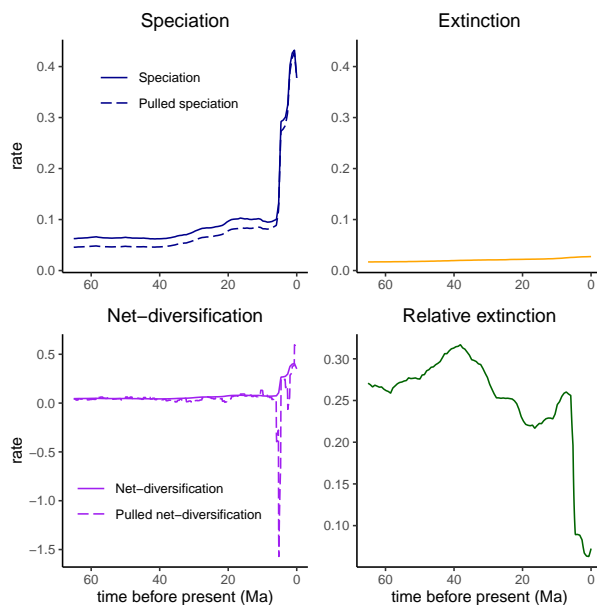

**Figure 2:** Estimated diversification rates for the primates phylogeny by Springer *et al.* (2012) using an episodic birth-death model with a horseshoe Markov random field prior (Magee *et al.* 2020) in RevBayes (Höhna *et al.* 2016). The original rates define the *reference* model in ACDC (solid lines). ACDC automatically computes the pulled speciation rate as well as the pulled net-diversification rate (dashed lines), which characterize the congruence class.

117 We use a fine grid of one thousand time points to improve the precision of the calculations. Then,  
 118 we can plot the diversification rates together with their pulled counterparts in ACDC using  
 119 `plot(my_model)` (Fig. 2). Studying the pulled speciation and pulled net-diversification rates itself  
 120 can highlight aspects of the congruence class (Helmstetter *et al.* 2021).

## 121 2.3 Transforming speciation and extinction rates

122 A researcher can either provide another speciation rate function (or extinction rate function) and  
123 ACDC computes the corresponding extinction rate function (or speciation rate function,  
124 respectively) so that the new pair also belongs to the same congruence class. If a user provides a  
125 new extinction rate function, and wishes to know the speciation rate, we can compute it as:

$$126 \quad \lambda_i = \frac{\sqrt{4 \times \lambda_{i-1} \times \Delta t + (r_p(t_i) \times \Delta t + \mu_i \times \Delta t - 1)^2} + r_p(t_i) \times \Delta t + \mu_i \times \Delta t - 1}{2 \times \Delta t} \quad . \quad (5)$$

127 We show in the Supplementary Material how Eq. (5) is derived from Eq. (3). We note that  $\lambda_0$  is  
128 equal for all models in the congruence class. Conversely, if a user provides a new speciation rate  
129 function, then we can solve Eq. (3) for  $\mu$  and get

$$130 \quad \mu_i = \lambda_i - r_p(t_i) + \frac{1}{\lambda_i} \frac{\lambda_i - \lambda_{i-1}}{\Delta t} \quad . \quad (6)$$

131 These two transformations allow us to explore the congruence class. We only need to propose an  
132 alternative speciation rate function, or an alternative extinction rate function, and then compute  
133 their counterpart for the new model to be within the congruence class.

## 134 2.4 Exploring congruent models for specific hypotheses

135 A first option to explore the congruence class is to test for specific alternative hypotheses.  
136 For example, one can test if a linearly or exponentially decreasing speciation rate function is  
137 contained within the congruence class. In principle, there are no limitations to the choice of  
138 specific hypotheses and we provide several examples in our vignette  
139 (<https://afmagee.github.io/ACDC>). This option is useful when a researcher has a specific  
140 hypothesis regarding when diversification rates could have changed and what shape the  
141 diversification rates function might have.

142 In our primate HSMRF analysis, we inferred that the speciation rate changed abruptly in  
143 the last few million years, but the extinction rate remained comparably constant (Fig. 2). We  
144 note that the speciation rate appears to drive the changes in the “observed” net-diversification  
145 rate, i.e., in our originally inferred net-diversification rate. As an illustration, we explore here the  
146 alternative scenario if it instead was the extinction rate that drove the changes in the  
147 net-diversification rate. Because the net-diversification rate is defined as  $\delta(t) = \lambda(t) - \mu(t)$ , we  
148 construct our new hypothesis for the extinction rate function as  $\mu'(t) = \mu_0 - \lambda(t)$  where  $\mu_0$  is any  
149 arbitrary value with  $\mu_0 \geq \sup(\lambda(t))$  to ensure that  $\mu'(t) \geq 0$ . In ACDC, we only need to specify the  
150 alternative extinction rate functions  $\mu'(t)$  and then call `congruent.models`.

```
151 mu_scaling <- c(1.1, 1.2, 1.5, 2.0)
152 mu_0s <- max(lambda(my_model$times)) * mu_scaling
153
154 mu_prime <- list()
155 for (i in seq_along(mu_scaling)){
156   mu_prime[[i]] <- local({
157     mu_0 <- mu_0s[i]
158     function(t) mu_0 - lambda(t)
159   })
160 }
161
162 alt_models <- congruent.models(my_model, mus = mu_prime)
163 plot(alt_models)
```

164 Even though we constructed the extinction rate functions to be responsible for the changes in the  
165 net-diversification rates, we observe that the corresponding speciation rate functions of the same  
congruence class are never constant (Fig. 3). This results in somewhat different net-diversification

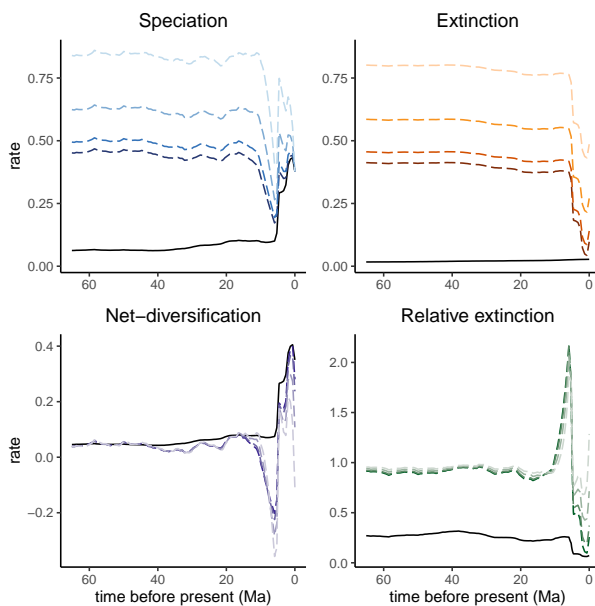

**Figure 3:** Alternative models contained in the congruence class. The solid black line depicts the *reference* model (*i.e.*, the model which we inferred and provided to ACDC). The four dashed lines in each plot show four different examples where we assumed that the extinction rate function was driving the net-diversification rates. The speciation rate functions, net-diversification rate functions and relative extinction rate functions are computed given the extinction rate functions to enforce that the models remain in the congruence class.

166

167 rate functions although both recent rate increases remain.



## 168 2.5 Exploring all congruent models, i.e., the congruence class

169 A second option is to explore the full congruence class. However, because there are  
170 infinitely many rate functions contained within the congruence class, we cannot explore every  
171 single model within the congruence class. Instead, we can sample randomly from a distribution of  
172 rate functions within the congruence class. We only need to specify how to create a random  
173 sample. For example, we could sample from different exponentially decreasing rate functions, or  
174 we could sample from a (discretized) Brownian motion.

175 In ACDC, we provide ways to randomly sample from several flexible rate distributions.  
176 These distributions can be specified using the function `sample.basic.model`, and [Table 1](#)  
177 provides an overview of the options for this function. A more detailed description is provided in  
178 our vignette (<https://afmagee.github.io/ACDC>).

**Table 1:** Options for sampling basic models using `sample.basic.model`.

| Argument     | Description                                                                                                |
|--------------|------------------------------------------------------------------------------------------------------------|
| times        | the vector of time points that we wish to sample at                                                        |
| rate0        | the rate at the present. If not specified, will draw a random log-normally distributed rate at the present |
| rate0.median | median rate at present                                                                                     |
| rate0.logsd  | standard deviation rate at present                                                                         |
| model        | either “exponential”, “linear”, “episodic”, “MRF” for Markov random field                                  |
| direction    | increase or decrease for the deterministic trend                                                           |
| noisy        | whether or not to add stochastic noise (the “MRF” component)                                               |
| MRF.type     | one of “HSMRF”, for horseshoe-, or “GMRF” for Gaussian Markov random field                                 |
| monotonic    | whether to enforce that the rate always changes in the same direction                                      |
| fc.mean      | mean fold-change                                                                                           |
| min.rate     | minimum rate value used for rejection sampling                                                             |
| max.rate     | maximum rate value used for rejection sampling                                                             |

179

180 As an example, we assume that an alternative extinction rate function corresponds to a  
181 Brownian motion. As a starting point for the Brownian motion at the present time  $t_0 = 0$ , we  
182 sample  $\mu'_0$  from a lognormal distribution. The distribution is centered around the reference  
183 estimate  $\mu_0$ , and we select the variance such that the central 95%-quantile of  $\mu'_0$  spans two orders  
184 of magnitude on the rate scale. Each preceding  $\mu_i$  is distributed as  $\text{lognormal}(\mu_{i-1}, \sigma)$ , where  
185  $\sigma \sim \text{HalfCauchy}(0, \zeta)$ , and  $\zeta$  is chosen depending on the number of epochs, so that the expected

186 number of effective shifts in the rate is  $\ln(2)$  (Magee *et al.* 2020). We repeat the entire procedure  
187 to draw each rate function.

```
188 extinction_rate_samples <- function() {  
189   sample.basic.models(  
190     times = primates_ebd[["time"]],  
191     model = "MRF",  
192     MRF.type = "GMRF",  
193     max.rate = 1,  
194     rate0.median = mu(0.0))  
195 }
```

196 Then, we use this function—which specifies how to generate new samples for the extinction rate  
197 function—to sample from the congruence class, which is done using the function  
198 `sample.congruence.class`. Here, we sample 20 new extinction rate functions and automatically  
199 compute the corresponding speciation rate functions.

```
200 samples <- sample.congruence.class(  
201   my_model,  
202   num.samples=20,  
203   rate.type="extinction",  
204   sample.extinction.rates=extinction_rate_samples)
```

205 We can plot the HSMRF-samples in ACDC, using `plot(samples)` (Fig. 4, left and middle columns).

## 206 2.6 Summarizing trends over congruent models

207 Once several models from the congruence class are obtained, we compute summaries of  
208 our sampled rate functions. Recall that we are primarily interested in changes in diversification  
209 rates over time for these models. Therefore, we compute the amount of rate change within a small  
210 interval  $\Delta t$  (*i.e.*, the slope of the rate functions)

$$211 \quad \Delta\lambda_i = \frac{\lambda_{i-1} - \lambda_i}{\Delta t} \quad . \quad (7)$$

212 Next, we extract at which times the change in diversification rate ( $\Delta\lambda$ ) is larger than a  
213 pre-defined threshold  $\epsilon$ : if  $\Delta\lambda$  is larger than  $\epsilon$  then we paint this time as a rate increase, and if  
214  $\Delta\lambda$  is smaller than  $-\epsilon$  then we paint this time as a rate decrease. Alternatively, we can compute  
215 the normalized slope of the rate function:

$$216 \quad \Delta\bar{\lambda}_i = \frac{\Delta\lambda_i}{\lambda_i} \quad . \quad (8)$$

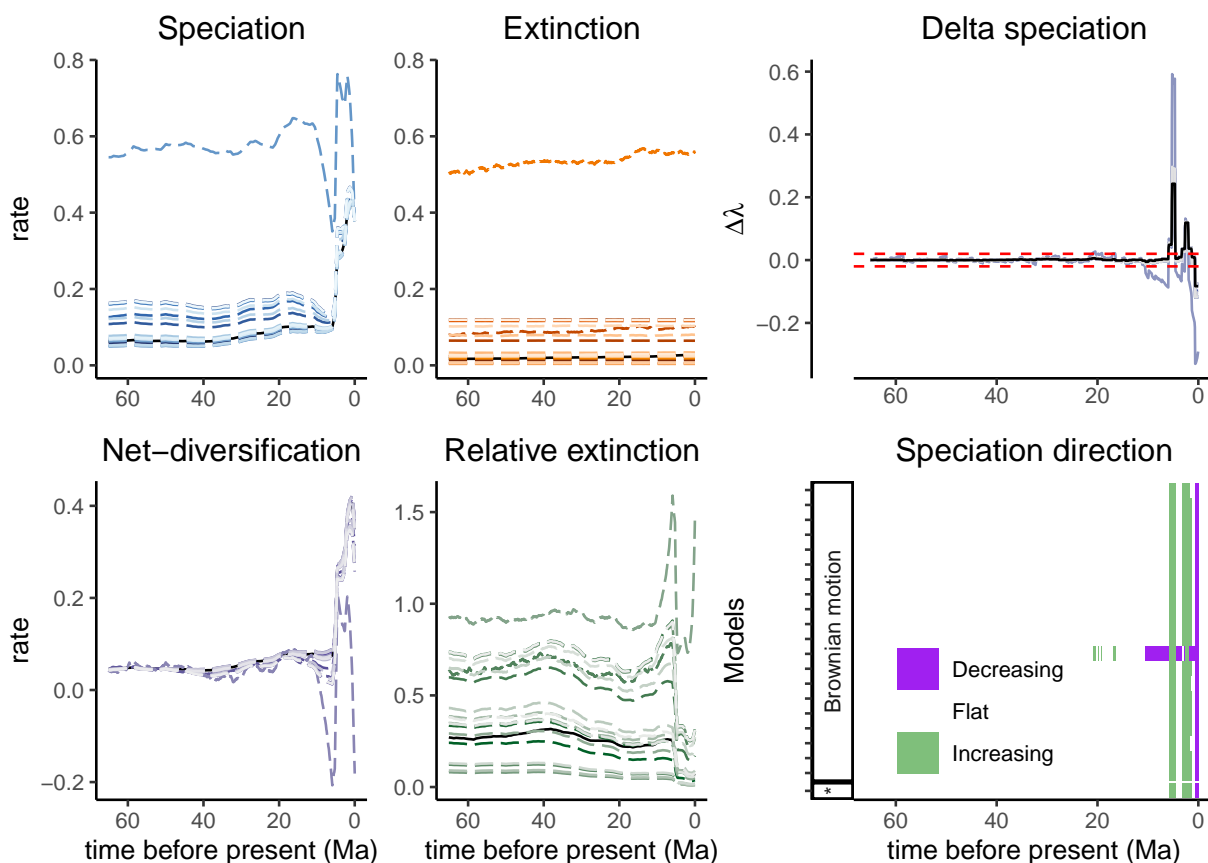

**Figure 4:** Congruent models where the extinction rates were sampled from a Brownian motion. The speciation rates were computed to match the extinction rates so that the models remain within the same congruence class. The net-diversification rates and relative extinction rate functions result from the speciation and extinction rate functions. The right column depicts the slope of the speciation rate ( $\Delta\lambda = (\lambda_{i-1} - \lambda_i)/\Delta t$ ), and a summary indicating whether the speciation rate function is decreasing, flat or increasing assuming a threshold for  $\Delta\lambda$  of  $\pm\epsilon = 0.02$ . The asterisk (\*), and the solid black lines represent the *reference model*.

217 The absolute slope represents the change in the speciation rate per time, while the normalized  
218 slope represents the fold-change in the speciation rate per time. The absolute slope has the  
219 advantage that we can easily specify a comparable threshold over the entire diversification history,  
220 while the normalized slope has the advantage that we can easily specify a threshold that is  
221 comparable between analyses/datasets.

222 Outliers can signal single rate changes detected by  $\Delta\lambda$  but could also be noise. Therefore,  
223 we implemented an option to smooth trends (either increases or decreases) by removing singleton  
224 outliers. We define an outlier as a time interval where both neighbors share the same trend but  
225 the interval itself has a different trend. The outlier is then replaced with the same trend as both  
226 its neighbors. This smoothing can clarify the overall signal to detect the total number of  
227 directional changes. However, smoothing might delete sharp or instantaneous rate changes.

228 In ACDC, we summarize the directional changes in the congruence class by specifying a  
229 threshold  $\epsilon$ , in units of rate change per time.

```
230 summarize.trends(samples, threshold = 0.02)
```

231 The summary provides us with an overview of the trends: how many of the sampled models have  
232 speciation rate functions that were increasing or decreasing at a given time. For the example  
233 primate dataset, we observe that sampled models had two speciation rate increases very recently,  
234 and one additional speciation rate decrease at the present (Fig. 4). A more detailed description of  
235 how to summarize and interpret trends is provided in our vignette  
236 (<https://afmagee.github.io/ACDC>).

## 237 2.7 Accommodating uncertainty in rates

238 In the above example, we explored the congruence class for the posterior median  
239 diversification rates. We can also explore congruence classes for samples from posterior  
240 distributions. That is, as an example, we compute the congruence class for 20 samples from the  
241 posterior distribution and draw 20 alternative rate functions for each posterior sample. First, we  
242 load our posterior samples.

```
243 data(primates_ebd_log)
244 posterior <- read.RevBayes(
245     primates_ebd_log,
246     n_times = 1000,
247     max_t = 65,
248     n_samples = 20)
```

249 We plot the speciation rate functions from the posterior sample in the left panel of Fig. 5 (see  
250 Supplementary Scripts for information about plotting). Next, we generate congruent models for  
251 each of the samples from the posterior.

```
252 samples <- sample.congruence.class.posterior(  
253     posterior,  
254     num.samples = 20,  
255     rate.type = "extinction",  
256     model="MRF",  
257     MRF.type = "GMRF",  
258     max.rate = 3.0,  
259     rate0.median = mu(0.0))
```

260 This selection yields 20 samples from the posterior, which are not congruent, but for each 20  
261 samples we generated a subset of 20 additional congruent models. Next, we can summarize and  
262 plot the directions of change in the speciation rate function.

```
263 summarize.posterior(samples, threshold = 0.02)
```

264 Directional changes are summarized to show the number of models with an increase (or decrease,  
265 Fig. 5, right panel), rather than to keep results from the same model consistent across rows. In  
266 contrast to results based solely on the posterior median model (Fig. 4), the posterior samples show  
267 more disagreement between trends in direction of rate changes. Nevertheless, we observe general  
268 agreement among rate functions for the same three rate changes; two speciation rate increases in  
269 the last eight million years followed by one speciation rate decrease very close to the present.

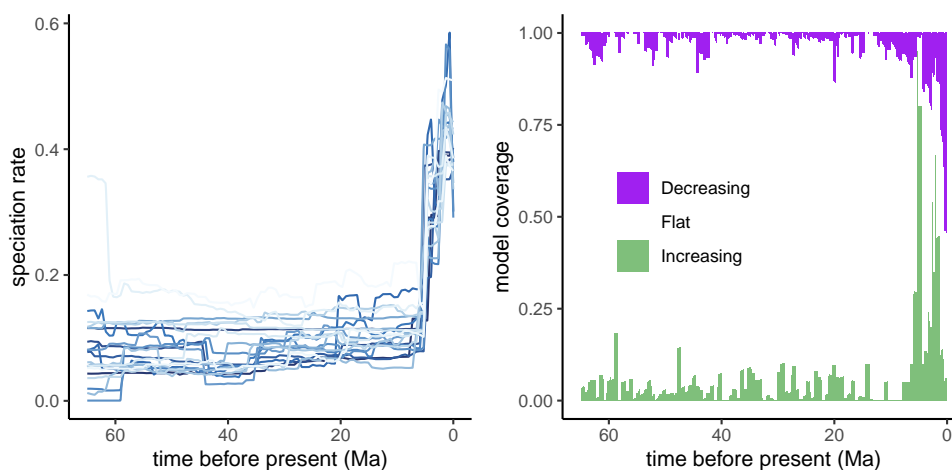

**Figure 5:** Left column: twenty posterior samples from the primates analyses. Right column: summary of trends over the posterior samples and congruence class samples for each posterior sample.

## 270 2.8 Summary of available functions

271 Finally, we present an overview of the most important functions available in ACDC  
272 (Table 2). We demonstrated the core functionality in the previous sections, and we also provide a  
273 vignette where we explore more detailed features of the package. We designed ACDC to have few,  
274 but generic functions, that allow for flexibility in exploration of the rate space in the congruence  
275 class.

**Table 2:** A summary of the core functions used in ACDC.

| Function                                       | Description                                                       |
|------------------------------------------------|-------------------------------------------------------------------|
| <code>congruent.models</code>                  | constructs models that are congruent with a reference model       |
| <code>create.model</code>                      | creates an ACDC model object                                      |
| <code>model2df</code>                          | converts an ACDC model object to a data frame, e.g. for plotting  |
| <code>plot.ACDC</code>                         | plots a birth-death model                                         |
| <code>plot.ACDCset</code>                      | plots a set of congruent models                                   |
| <code>sample.basic.models</code>               | samples rate functions from various distributions (see Table 1)   |
| <code>sample.congruence.class</code>           | samples models from the congruence class                          |
| <code>sample.congruence.class.posterior</code> | sample congruence class from the posterior                        |
| <code>sample.rates</code>                      | samples custom rate functions                                     |
| <code>summarize.posterior</code>               | plots a summary of the directional trends in the posterior        |
| <code>summarize.trends</code>                  | plots a summary of the directional trends in the congruence class |
| <code>read.RevBayes</code>                     | reads a RevBayes log file                                         |

276

277 We designed ACDC to use standard `ggplot` objects (Wickham 2016) so that plots can  
278 easily be manipulated as any other `ggplot` objects. For example, it is possible to change the axis  
279 limits, axis labels, or the time scale. This allows for flexibility in visualizing the congruence class  
280 for other data sets than we have exemplified here.

### 281 3 Discussion and conclusions

282 In this paper we present the R package `ACDC`, Analysis of Congruent Diversification  
283 Classes. `ACDC` is available on CRAN and the source code is available from GitHub  
284 (<https://github.com/afmagee/ACDC>). `ACDC` enables easy testing of the impact of non-identifiable  
285 diversification rates. Specifically, with `ACDC` anyone can test specific alternative diversification  
286 rate hypotheses (Morlon *et al.* 2020), or explore equally probable diversification rate models for  
287 shared characteristics. Thus, non-identifiability of diversification rates can be incorporated into  
288 conclusions about the process shaping historical biodiversity.

289 In our main example of exploring a congruence class, we sampled alternative rate  
290 functions from a Brownian motion process. This choice reflects our belief that Brownian motion  
291 might be a good approximation of how diversification rates have changed over time, but other  
292 approaches should be considered (see Condamine *et al.* 2018, Magee *et al.* 2020 and Palazzesi  
293 *et al.* 2022 for comparisons of diversification rate models through time). To assist with this, `ACDC`  
294 provides functions to generate alternative rate functions with stochastic changes, as well as  
295 diversification rate functions with deterministic trends (e.g., exponential and linear). The existing  
296 functions to explore the congruence class can accept any type of rate functions. It remains  
297 unclear what the best approach to sample alternative rate functions is, and we leave the decision  
298 to the researcher for the specific study.

299 The primary output of `ACDC` is the congruence class and models belonging to this  
300 congruence class. Since changes in diversification rates are generally of interest, rather than the  
301 rates themselves, we focus on summaries of the congruence class showing directional trends in  
302 diversification rates (increasing, decreasing or flat). However, these summaries strongly depend on  
303 the chosen threshold for assessing whether the diversification rate was changing or not. We chose  
304 an arbitrary threshold of  $\epsilon = 0.02$ , which signifies that any rate change of  $\pm 0.02$  per million years  
305 is a significant trend. We recommend in practice testing summaries using a variety of thresholds.  
306 We strongly recommend researchers begin by exploring and visualizing specific models (as in  
307 [Section 2.4](#)), before examining broader sections of the congruence class (as in [Sections 2.5](#)  
308 and [2.6](#)).

309 Finally, non-identifiability of diversification rates extends to diversification rates inferred  
310 from phylogenies with fossil taxa (Louca *et al.* 2021). In `ACDC`, we only focus on speciation and  
311 extinction rate functions and omit fossilization rates. However, it is possible to analyze a  
312 congruence class obtained from a phylogeny with fossil taxa using an approach analogous to what  
313 we described here. If a specific new extinction rate function was chosen, then both the speciation  
314 rate function and fossilization rate function can be computed given the congruence class. The

315 results with ACDC are still valid for speciation and extinction rates, and could be considered as if  
316 the fossilization was simply not shown.

317 Non-identifiability of diversification rates has questioned the reliability and interpretation  
318 of diversification rate estimates from current approaches. Non-identifiability is a very real  
319 problem and should not be neglected. ACDC provides a new tool to assess if the conclusions drawn  
320 about patterns of diversification rates are robust despite the existence of infinitely many  
321 alternative diversification models.

## 322 **4 Acknowledgments**

323 We thank Luiza Fabreti, Ronja Billenstein and Killian Smith for feedback about  
324 visualizing and interpreting congruence classes.

## 325 **5 Funding**

326 This work was supported by the Deutsche Forschungsgemeinschaft (DFG) Emmy  
327 Noether-Program (Award HO 6201/1-1 to S.H.). AFM was partially supported by National  
328 Science Foundation grant DGE-1762114 and National Institutes of Health grant R01 AI153044.

## 329 **6 Author Contributions**

330 SH and AFM conceived the study. SH, BTK and AFM developed the R package ACDC. SH  
331 and BTK drafted the manuscript. All authors revised and approved the manuscript.



## 332 References

- 333 Carvalho, C.M., Polson, N.G. & Scott, J.G. (2010) The horseshoe estimator for sparse signals.  
334 *Biometrika*, **97**, 465–480.
- 335 Condamine, F.L., Rolland, J., Höhna, S., Sperling, F.A.H. & Sanmartín, I. (2018) Testing the role  
336 of the Red Queen and Court Jester as drivers of the macroevolution of Apollo butterflies.  
337 *Systematic Biology*, **67**, 940–964.
- 338 Condamine, F.L., Rolland, J. & Morlon, H. (2013) Macroevolutionary perspectives to  
339 environmental change. *Ecology Letters*, **16**, 72–85.
- 340 Condamine, F.L., Rolland, J. & Morlon, H. (2019) Assessing the causes of diversification  
341 slowdowns: temperature-dependent and diversity-dependent models receive equivalent support.  
342 *Ecology letters*, **22**, 1900–1912.
- 343 Culshaw, V., Stadler, T. & Sanmartín, I. (2019) Exploring the power of Bayesian birth-death  
344 skyline models to detect mass extinction events from phylogenies with only extant taxa.  
345 *Evolution*, **73**, 1133–1150.
- 346 Helmstetter, A.J., Glemin, S., Käfer, J., Zenil-Ferguson, R., Sauquet, H., de Boer, H., Dagallier,  
347 L.P.M.J., Mazet, N., Reboud, E.L., Couvreur, T.L.P. & Condamine, F.L. (2021) Pulled  
348 Diversification Rates, Lineages-Through-Time Plots and Modern Macroevolutionary Modelling.  
349 *Systematic Biology*.
- 350 Höhna, S. (2014) Likelihood Inference of Non-Constant Diversification Rates with Incomplete  
351 Taxon Sampling. *PLoS One*, **9**, e84184.
- 352 Höhna, S. (2015) The time-dependent reconstructed evolutionary process with a key-role for  
353 mass-extinction events. *Journal of Theoretical Biology*, **380**, 321–331.
- 354 Höhna, S., Landis, M.J., Heath, T.A., Boussau, B., Lartillot, N., Moore, B.R., Huelsenbeck, J.P.  
355 & Ronquist, F. (2016) RevBayes: Bayesian phylogenetic inference using graphical models and  
356 an interactive model-specification language. *Systematic Biology*, **65**, 726–736.
- 357 Kubo, T. & Iwasa, Y. (1995) Inferring the rates of branching and extinction from molecular  
358 phylogenies. *Evolution*, **49**, 694–704.
- 359 Louca, S., McLaughlin, A., MacPherson, A., Joy, J.B. & Pennell, M.W. (2021) Fundamental  
360 Identifiability Limits in Molecular Epidemiology. *Molecular Biology and Evolution*, **38**,  
361 4010–4024.
- 362 Louca, S. & Pennell, M.W. (2020) Extant timetrees are consistent with a myriad of diversification  
363 histories. *Nature*, **580**, 502–505.

- 364 Magee, A.F. & Höhna, S. (2021) Impact of K-Pg Mass Extinction Event on Crocodylomorpha  
365 Inferred from Phylogeny of Extinct and Extant Taxa. *bioRxiv*.
- 366 Magee, A.F., Höhna, S., Vasylyeva, T.I., Leaché, A.D. & Minin, V.N. (2020) Locally adaptive  
367 Bayesian birth-death model successfully detects slow and rapid rate shifts. *PLoS*  
368 *Computational Biology*, **16**, e1007999.
- 369 May, M.R., Höhna, S. & Moore, B.R. (2016) A bayesian approach for detecting the impact of  
370 mass-extinction events on molecular phylogenies when rates of lineage diversification may vary.  
371 *Methods in Ecology and Evolution*, **7**, 947–959.
- 372 Morlon, H., Parsons, T. & Plotkin, J. (2011) Reconciling molecular phylogenies with the fossil  
373 record. *Proceedings of the National Academy of Sciences*, **108**, 16327–16332.
- 374 Morlon, H. (2014) Phylogenetic approaches for studying diversification. *Ecology letters*, **17**,  
375 508–525.
- 376 Morlon, H., Hartig, F. & Robin, S. (2020) Prior hypotheses or regularization allow inference of  
377 diversification histories from extant timetrees. *bioRxiv*.
- 378 Palazzesi, L., Hidalgo, O., Barreda, V.D., Forest, F. & Höhna, S. (2022) The rise of grasslands is  
379 linked to atmospheric CO<sub>2</sub> decline in the late Paleogene. *Nature Communications*, **13**, 293.
- 380 Rabosky, D.L. (2006) Likelihood methods for detecting temporal shifts in diversification rates.  
381 *Evolution*, **60**, 1152–1164.
- 382 Ricklefs, R. (2007) Estimating diversification rates from phylogenetic information. *Trends in*  
383 *Ecology & Evolution*, **22**, 601–610.
- 384 Springer, M.S., Meredith, R.W., Gatesy, J., Emerling, C.A., Park, J., Rabosky, D.L., Stadler, T.,  
385 Steiner, C., Ryder, O.A., Janečka, J.E. *et al.* (2012) Macroevolutionary dynamics and historical  
386 biogeography of primate diversification inferred from a species supermatrix. *PLoS One*, **7**,  
387 e49521.
- 388 Stadler, T. (2011) Mammalian phylogeny reveals recent diversification rate shifts. *Proceedings of*  
389 *the National Academy of Sciences*, **108**, 6187–6192.
- 390 Wickham, H. (2016) *ggplot2: Elegant Graphics for Data Analysis*. Springer-Verlag New York.
